# Supplementary material
Source: publisher figshare collection journal article supplement (https://acs.figshare.com/ndownloader/files/24574682)
Supplement: Supplementary file 1 [file 24574682]

Compound ID	Smiles	IC50 (�M) against CHO	Efficiency
8	C/C(CC/C=C(C)/C)=C/CCl	ND	ND
6j	C/C(CC/C=C(C)\C)=C/CNCCCN(CCCN)CCCN	10.47	7.17
5r	C/C(CC/C=C(C)\C)=C/CNCCCN(CCCN)CCCN	126.82	3.65
